# Supplementary material
Source: PubMed Central journal article supplement (PMC2527537)
Supplement: NIHMS63144-supplement-1si20070322_07.pdf [file NIHMS63144-supplement-1si20070322_07.pdf]

# Cyclization cascade of allenyl azides: A dual mechanism

Carlos Silva López<sup>1,2†</sup>, Olalla Nieto Faza<sup>1,2</sup>, Ken S. Feldman<sup>3</sup>,  
Malliga R. Iyer<sup>3</sup> and D. Keith Hester II<sup>3</sup>

March 12, 2007

1. Departamento de Química Organica, Universidade de Vigo, Lagoas Marcosende, 36200, Vigo, Galicia, Spain
2. Department of Chemistry, University of Minnesota, 207 Pleasant St. SE, Minneapolis, MN 55455-0431, USA.
3. Department of Chemistry, The Pennsylvania State University, 104 Chemistry Building, University Park, Pennsylvania 16802, USA

<sup>†</sup>*Correspondence: silva@chem.umn.edu, csilval@uvigo.es*

## **Contents**

|          |                              |             |
|----------|------------------------------|-------------|
| <b>1</b> | <b>Gaussian reference</b>    | <b>S-3</b>  |
| <b>2</b> | <b>Method Validation</b>     | <b>S-3</b>  |
| <b>3</b> | <b>Cartesian Coordinates</b> | <b>S-4</b>  |
|          | <b>References</b>            | <b>S-51</b> |

## 1 Gaussian reference

See References section at the end of this document (cite 1)

## 2 Method Validation

The combination of the B3LYP density functional and pople basis set chosen in this work has shown to be highly accurate in several diyl forming reactions.<sup>2-6</sup> A summary is given in Figure S1.

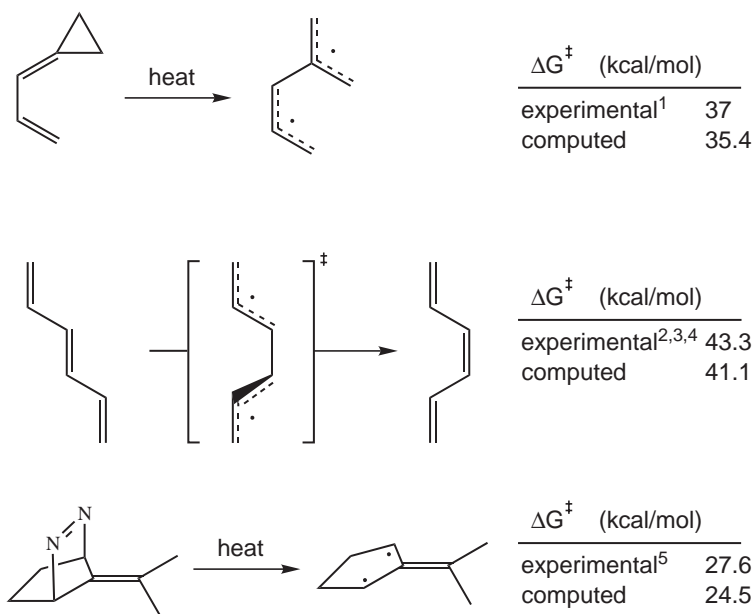

**Figure S1:** Reference systems used to validate the level of theory employed.

### 3 Cartesian Coordinates

Geometries: B3LYP/6-31G(d,p)

SCF energies: B3LYP/6-311+G(d,p)

C-1

SCF Energy: -588.856325523

Num. Imaginary Frequencies: 0

|   |           |           |           |
|---|-----------|-----------|-----------|
| C | 0.865385  | -1.051709 | -0.107096 |
| C | 1.059282  | 0.348026  | -0.062839 |
| C | 2.337102  | 0.884196  | 0.140121  |
| C | 3.436685  | 0.046847  | 0.304178  |
| C | 3.266300  | -1.338007 | 0.269330  |
| C | 1.995578  | -1.867689 | 0.067908  |
| N | -0.091687 | 1.155580  | -0.223030 |
| H | 2.466089  | 1.962221  | 0.171287  |
| H | 4.420655  | 0.477963  | 0.460442  |
| H | 4.116476  | -2.000116 | 0.398672  |
| H | 1.859914  | -2.945424 | 0.040402  |
| C | -0.436779 | -1.705547 | -0.313315 |
| C | -1.609868 | -1.180807 | -0.594096 |
| H | -0.402047 | -2.793720 | -0.222897 |
| N | 0.026950  | 2.384869  | -0.194021 |
| N | -0.017226 | 3.525965  | -0.191670 |
| C | -2.825589 | -0.773204 | -0.883805 |
| C | -3.860013 | -0.370151 | 0.083804  |
| H | -3.099667 | -0.707769 | -1.937817 |
| C | -3.681785 | -0.170150 | 1.395264  |
| H | -4.849723 | -0.221193 | -0.344133 |
| H | -4.507798 | 0.118751  | 2.036437  |
| H | -2.707950 | -0.286448 | 1.861925  |

C-3

SCF Energy: -588.901834753

Num. Imaginary Frequencies: 0

|   |           |           |           |
|---|-----------|-----------|-----------|
| C | 1.230911  | -0.879144 | -0.287877 |
| C | 1.112783  | 0.505122  | 0.034426  |
| C | 2.198714  | 1.297522  | 0.402407  |
| C | 3.443888  | 0.677303  | 0.448794  |
| C | 3.593007  | -0.687509 | 0.136593  |
| C | 2.502570  | -1.469383 | -0.230001 |
| N | -0.233320 | 0.793791  | -0.113885 |
| H | 2.072641  | 2.347847  | 0.640593  |
| H | 4.316299  | 1.258267  | 0.731389  |
| H | 4.580585  | -1.136319 | 0.183666  |
| H | 2.631794  | -2.521005 | -0.468787 |
| C | -0.089301 | -1.380771 | -0.624840 |
| C | -0.950002 | -0.327614 | -0.504108 |
| H | -0.335457 | -2.390472 | -0.920273 |
| N | -1.022176 | 1.915935  | 0.032044  |
| N | -2.212081 | 1.635267  | -0.237916 |
| C | -2.355418 | 0.167648  | -0.615238 |
| C | -3.410980 | -0.463405 | 0.263731  |
| H | -2.713820 | 0.174454  | -1.655319 |
| C | -3.213053 | -1.489434 | 1.087517  |
| H | -4.390744 | 0.001293  | 0.181272  |
| H | -4.026108 | -1.889704 | 1.684598  |
| H | -2.240878 | -1.961319 | 1.192727  |

C-5a

SCF Energy: -479.393886062

Num. Imaginary Frequencies: 0

|   |           |           |           |
|---|-----------|-----------|-----------|
| C | -0.754219 | 0.668525  | -0.106457 |
| C | -0.981969 | -0.785454 | 0.041780  |
| C | -2.324246 | -1.275992 | 0.166911  |
| C | -3.349859 | -0.376714 | 0.133999  |
| C | -3.126860 | 1.045689  | -0.019572 |
| C | -1.871825 | 1.566233  | -0.138502 |
| H | -2.494081 | -2.341506 | 0.281458  |
| H | -4.374961 | -0.725422 | 0.223896  |
| H | -3.991684 | 1.702400  | -0.037715 |
| H | -1.715454 | 2.635304  | -0.251096 |
| C | 0.604981  | 0.818791  | -0.205829 |
| C | 1.152921  | -0.532472 | -0.105098 |
| N | 0.133700  | -1.490552 | 0.025878  |
| C | 2.457380  | -0.938086 | -0.145906 |
| H | 1.167114  | 1.724925  | -0.380056 |
| C | 3.650779  | -0.112566 | -0.171131 |
| H | 2.604130  | -2.016245 | -0.177298 |
| C | 3.808443  | 1.069227  | 0.449851  |
| H | 4.505795  | -0.542167 | -0.692460 |
| H | 4.745234  | 1.613626  | 0.387697  |
| H | 3.024845  | 1.499874  | 1.064151  |

C-5b

SCF Energy: -479.397793949

Num. Imaginary Frequencies: 0

|   |           |           |          |
|---|-----------|-----------|----------|
| C | -1.359156 | 0.277585  | 0.000000 |
| C | 0.000000  | 0.853874  | 0.000000 |
| C | 0.155157  | 2.276171  | 0.000000 |
| C | -0.969546 | 3.053231  | 0.000000 |
| C | -2.300254 | 2.490018  | 0.000000 |
| C | -2.502556 | 1.140038  | 0.000000 |
| H | 1.151394  | 2.706189  | 0.000000 |
| H | -0.873302 | 4.135611  | 0.000000 |
| H | -3.148000 | 3.168601  | 0.000000 |
| H | -3.505429 | 0.722451  | 0.000000 |
| C | -1.171638 | -1.081706 | 0.000000 |
| C | 0.275659  | -1.279927 | 0.000000 |
| N | 0.956867  | -0.064536 | 0.000000 |
| C | 0.869198  | -2.518031 | 0.000000 |
| H | -1.916924 | -1.866967 | 0.000000 |
| H | 0.183256  | -3.363147 | 0.000000 |
| C | 2.274712  | -2.860574 | 0.000000 |
| C | 3.305929  | -1.991746 | 0.000000 |
| H | 2.488932  | -3.927808 | 0.000000 |
| H | 4.329494  | -2.354591 | 0.000000 |
| H | 3.127491  | -0.922191 | 0.000000 |

C-7a

SCF Energy: -479.425619335

Num. Imaginary Frequencies: 0

|   |           |           |           |
|---|-----------|-----------|-----------|
| C | 0.521239  | 0.535840  | 0.168332  |
| C | 0.804475  | -0.848634 | 0.034700  |
| C | 2.108740  | -1.298724 | -0.149198 |
| C | 3.134405  | -0.348562 | -0.203045 |
| C | 2.861101  | 1.015702  | -0.069116 |
| C | 1.548079  | 1.467230  | 0.132186  |
| H | 2.310442  | -2.359684 | -0.254241 |
| H | 4.159214  | -0.676085 | -0.352849 |
| H | 3.673526  | 1.734474  | -0.121289 |
| H | 1.347181  | 2.529305  | 0.245777  |
| C | -0.951745 | 0.620895  | 0.467296  |
| C | -1.338281 | -0.830854 | 0.249265  |
| N | -0.364962 | -1.660012 | 0.055141  |
| C | -2.773024 | -0.897969 | 0.008483  |
| H | -1.074292 | 0.848556  | 1.537528  |
| C | -3.197626 | 0.345542  | -0.298482 |
| H | -3.363103 | -1.805901 | -0.014615 |
| C | -2.074691 | 1.376067  | -0.291845 |
| H | -4.216390 | 0.603296  | -0.571649 |
| H | -2.367012 | 2.322213  | 0.175090  |
| H | -1.770865 | 1.604714  | -1.321192 |



C-7b

SCF Energy: -479.443179317

Num. Imaginary Frequencies: 0

|   |           |           |           |
|---|-----------|-----------|-----------|
| C | -1.286847 | 0.002709  | 0.000000  |
| C | 0.000000  | 0.633104  | 0.000000  |
| C | 0.150250  | 2.023001  | 0.000000  |
| C | -1.006654 | 2.795585  | 0.000000  |
| C | -2.283769 | 2.199434  | 0.000000  |
| C | -2.432042 | 0.818056  | 0.000000  |
| H | 1.133417  | 2.484225  | 0.000000  |
| H | -0.923440 | 3.878409  | 0.000000  |
| H | -3.165100 | 2.834023  | 0.000000  |
| H | -3.421787 | 0.369749  | 0.000000  |
| C | -1.079225 | -1.420422 | 0.000000  |
| C | 0.283459  | -1.609708 | 0.000000  |
| N | 0.930454  | -0.379066 | 0.000000  |
| C | 1.319668  | -2.628273 | 0.000000  |
| H | -1.839914 | -2.187475 | 0.000000  |
| H | 1.132173  | -3.694202 | 0.000000  |
| C | 2.527055  | -2.028643 | 0.000000  |
| C | 2.376906  | -0.519004 | 0.000000  |
| H | 3.493476  | -2.516284 | 0.000000  |
| H | 2.832596  | -0.055009 | 0.886198  |
| H | 2.832596  | -0.055009 | -0.886198 |

C-2

SCF Energy: -588.819442087

Num. Imaginary Frequencies: 1

|   |           |           |           |
|---|-----------|-----------|-----------|
| C | 1.150765  | -0.854073 | -0.323373 |
| C | 1.149809  | 0.546613  | -0.129958 |
| C | 2.287006  | 1.234495  | 0.282055  |
| C | 3.452424  | 0.499883  | 0.516805  |
| C | 3.479727  | -0.883967 | 0.316073  |
| C | 2.335321  | -1.562169 | -0.108144 |
| N | -0.100809 | 1.055391  | -0.496685 |
| H | 2.260274  | 2.310835  | 0.415483  |
| H | 4.347387  | 1.015678  | 0.850714  |
| H | 4.397477  | -1.435788 | 0.493509  |
| H | 2.355738  | -2.638327 | -0.254217 |
| C | -0.153615 | -1.382318 | -0.721278 |
| C | -1.193324 | -0.546381 | -0.773659 |
| H | -0.267184 | -2.427202 | -0.999283 |
| N | -0.768562 | 1.976635  | 0.049894  |
| N | -1.861045 | 2.328150  | 0.235785  |
| C | -2.503381 | -0.188366 | -0.766247 |
| C | -3.467162 | -0.595528 | 0.257627  |
| H | -2.893991 | 0.372075  | -1.613084 |
| C | -3.253492 | -1.433065 | 1.284545  |
| H | -4.458663 | -0.163552 | 0.134746  |
| H | -4.047218 | -1.672193 | 1.983691  |
| H | -2.285371 | -1.893506 | 1.458818  |

C-4a

SCF Energy: -588.867939904

Num. Imaginary Frequencies: 1

|   |           |           |           |
|---|-----------|-----------|-----------|
| C | 1.366655  | -0.860714 | -0.293414 |
| C | 1.049804  | 0.448410  | 0.200265  |
| C | 2.057647  | 1.333190  | 0.587587  |
| C | 3.379307  | 0.895689  | 0.504811  |
| C | 3.700383  | -0.398045 | 0.051949  |
| C | 2.702955  | -1.284681 | -0.343281 |
| N | -0.324837 | 0.615051  | 0.205315  |
| H | 1.813463  | 2.330154  | 0.940347  |
| H | 4.180044  | 1.566485  | 0.802982  |
| H | 4.740450  | -0.708585 | 0.020729  |
| H | 2.954608  | -2.289648 | -0.672029 |
| C | 0.115393  | -1.430629 | -0.705214 |
| C | -0.854706 | -0.487229 | -0.384274 |
| H | -0.051784 | -2.417460 | -1.117798 |
| N | -1.642501 | 1.927082  | -0.705377 |
| N | -2.477507 | 1.207078  | -1.037676 |
| C | -2.302821 | -0.472250 | -0.625141 |
| C | -3.276447 | -0.651660 | 0.483239  |
| H | -2.615865 | -0.969416 | -1.543989 |
| C | -2.937384 | -0.689299 | 1.775607  |
| H | -4.316599 | -0.759379 | 0.183665  |
| H | -3.688563 | -0.841025 | 2.544080  |
| H | -1.906550 | -0.572295 | 2.093393  |

C-4b

SCF Energy: -588.869714286

Num. Imaginary Frequencies: 1

|   |           |           |           |
|---|-----------|-----------|-----------|
| C | -1.234023 | -0.859914 | -0.227987 |
| C | -1.185243 | 0.569461  | -0.130866 |
| C | -2.331605 | 1.315023  | 0.154066  |
| C | -3.531886 | 0.625852  | 0.313307  |
| C | -3.600379 | -0.775843 | 0.187318  |
| C | -2.461942 | -1.525614 | -0.088152 |
| N | 0.112712  | 0.985140  | -0.361671 |
| H | -2.283193 | 2.395440  | 0.244224  |
| H | -4.438664 | 1.182686  | 0.531587  |
| H | -4.558991 | -1.273568 | 0.299152  |
| H | -2.524294 | -2.604531 | -0.204055 |
| C | 0.124732  | -1.285376 | -0.413601 |
| C | 0.887332  | -0.121519 | -0.461340 |
| H | 0.483709  | -2.291374 | -0.584655 |
| N | 1.484256  | 2.205133  | 0.412618  |
| N | 2.467033  | 1.644445  | 0.184873  |
| C | 2.327816  | 0.094460  | -0.644405 |
| C | 3.297776  | -0.871219 | -0.091892 |
| H | 2.622327  | 0.486087  | -1.621302 |
| C | 3.054064  | -1.643762 | 0.974934  |
| H | 4.263904  | -0.921844 | -0.587470 |
| H | 3.795952  | -2.350075 | 1.333740  |
| H | 2.111398  | -1.595133 | 1.509741  |

C-6a

SCF Energy: -479.369103796

Num. Imaginary Frequencies: 1

|   |           |           |           |
|---|-----------|-----------|-----------|
| C | -0.611975 | 0.580458  | -0.228538 |
| C | -0.848203 | -0.822192 | 0.032911  |
| C | -2.159825 | -1.272720 | 0.288971  |
| C | -3.190642 | -0.351421 | 0.256741  |
| C | -2.965300 | 1.023590  | -0.025885 |
| C | -1.691625 | 1.493064  | -0.273196 |
| H | -2.339169 | -2.322433 | 0.497139  |
| H | -4.207874 | -0.684210 | 0.445124  |
| H | -3.810129 | 1.705261  | -0.043658 |
| H | -1.517284 | 2.545374  | -0.481363 |
| C | 0.771620  | 0.677336  | -0.480517 |
| C | 1.268633  | -0.713168 | -0.274392 |
| N | 0.291644  | -1.585511 | -0.014967 |
| C | 2.665770  | -0.924055 | -0.264168 |
| H | 1.233506  | 1.400004  | -1.138464 |
| C | 3.390550  | 0.211688  | 0.077787  |
| H | 3.108864  | -1.886141 | -0.501050 |
| C | 2.701637  | 1.224885  | 0.761455  |
| H | 4.428202  | 0.351070  | -0.220784 |
| H | 3.076170  | 2.246639  | 0.773031  |
| H | 2.002357  | 0.978227  | 1.547785  |

C-6b

SCF Energy: -479.370245123

Num. Imaginary Frequencies: 1

|   |           |           |           |
|---|-----------|-----------|-----------|
| C | -0.948483 | 0.910964  | 0.049735  |
| C | -0.528468 | -0.472974 | -0.142319 |
| C | -1.494809 | -1.513701 | -0.212614 |
| C | -2.818797 | -1.184614 | -0.056086 |
| C | -3.236783 | 0.169770  | 0.150539  |
| C | -2.332603 | 1.203102  | 0.198608  |
| H | -1.176344 | -2.539584 | -0.370414 |
| H | -3.575355 | -1.963316 | -0.091027 |
| H | -4.297147 | 0.374979  | 0.266712  |
| H | -2.663523 | 2.225820  | 0.357358  |
| C | 0.214579  | 1.687321  | -0.015411 |
| C | 1.279570  | 0.768861  | -0.174581 |
| N | 0.795489  | -0.543950 | -0.330960 |
| C | 2.672406  | 0.922815  | -0.114602 |
| H | 0.309189  | 2.754781  | 0.132566  |
| H | 3.140879  | 1.890782  | -0.268739 |
| C | 3.391130  | -0.264572 | 0.021183  |
| C | 2.681323  | -1.373881 | 0.481507  |
| H | 4.392094  | -0.370973 | -0.389602 |
| H | 2.991452  | -2.383776 | 0.219088  |
| H | 2.035925  | -1.299604 | 1.345016  |

C-8

SCF Energy: -479.355701499

Num. Imaginary Frequencies: 1

|   |           |           |           |
|---|-----------|-----------|-----------|
| C | -0.940217 | 0.784129  | -0.078903 |
| C | -0.832212 | -0.633867 | -0.224825 |
| C | -1.934793 | -1.449506 | -0.073467 |
| C | -3.174931 | -0.842497 | 0.228069  |
| C | -3.292644 | 0.542082  | 0.373348  |
| C | -2.174671 | 1.373994  | 0.222273  |
| H | -1.847072 | -2.525478 | -0.184043 |
| H | -4.054651 | -1.467785 | 0.348748  |
| H | -4.259688 | 0.977346  | 0.604776  |
| H | -2.268797 | 2.450332  | 0.336637  |
| C | 0.378320  | 1.268165  | -0.292057 |
| C | 1.193901  | 0.096058  | -0.559253 |
| N | 0.493148  | -1.024704 | -0.521553 |
| C | 2.637431  | 0.129888  | -0.881132 |
| H | 0.725155  | 2.293862  | -0.263058 |
| H | 2.908418  | 0.298949  | -1.921191 |
| C | 3.650079  | -0.028972 | 0.060527  |
| C | 3.469297  | -0.264990 | 1.411811  |
| H | 4.672560  | 0.038363  | -0.308888 |
| H | 4.316732  | -0.374180 | 2.079037  |
| H | 2.477954  | -0.365390 | 1.840498  |

N<sub>2</sub>  
SCF Energy: -109.559421709  
Num. Imaginary Frequencies: 0  
N 0.447250 0.000000 0.000000  
N 1.552750 0.000000 0.000000  
N 0.000000 0.000000 0.552750  
N 0.000000 0.000000 -0.552750



NC-1

SCF Energy: -436.390235639

Num. Imaginary Frequencies: 0

|   |           |           |           |
|---|-----------|-----------|-----------|
| C | 3.247083  | -1.289191 | 1.055987  |
| C | 3.178070  | -1.130404 | -0.271218 |
| C | 2.436411  | -0.078821 | -0.990042 |
| C | 1.664480  | 0.839167  | -0.445525 |
| C | 0.902754  | 1.752988  | 0.098427  |
| C | -0.583032 | 1.632492  | 0.360980  |
| C | -1.171951 | 0.288394  | -0.049670 |
| N | -2.620371 | 0.312744  | 0.264421  |
| N | -3.247315 | -0.712943 | -0.014547 |
| N | -3.937307 | -1.599655 | -0.224944 |
| H | 1.358066  | 2.699722  | 0.395778  |
| H | 2.545967  | -0.071148 | -2.074961 |
| H | 3.713031  | -1.827358 | -0.913457 |
| H | 3.819569  | -2.098782 | 1.495680  |
| H | 2.737354  | -0.615258 | 1.739008  |
| H | -0.675745 | -0.526864 | 0.492145  |
| H | -1.016033 | 0.115502  | -1.122089 |
| H | -0.777347 | 1.800231  | 1.428175  |
| H | -1.112800 | 2.435188  | -0.168411 |

NC-3

SCF Energy: -436.418906761

Num. Imaginary Frequencies: 0

|   |           |           |           |
|---|-----------|-----------|-----------|
| C | 0.148396  | -0.275939 | -0.470110 |
| C | 0.814412  | -1.437247 | -0.464439 |
| C | 2.257787  | -1.169666 | -0.048093 |
| C | 2.207538  | 0.276792  | 0.536306  |
| N | 0.980038  | 0.789117  | -0.079149 |
| C | -1.191057 | 0.371196  | -0.645476 |
| C | -2.401882 | -0.280829 | -0.026901 |
| C | -2.407617 | -1.404245 | 0.686515  |
| H | -1.397789 | 0.572844  | -1.708258 |
| H | -3.327180 | 0.266300  | -0.194041 |
| H | -3.330831 | -1.799816 | 1.097701  |
| H | -1.497121 | -1.960255 | 0.887010  |
| N | -0.964855 | 1.740418  | -0.007464 |
| N | 0.242555  | 1.870540  | 0.315177  |
| H | 0.434223  | -2.404029 | -0.763226 |
| H | 2.632796  | -1.888146 | 0.687977  |
| H | 2.935514  | -1.215173 | -0.911941 |
| H | 2.106327  | 0.263428  | 1.629140  |
| H | 3.074435  | 0.883951  | 0.268880  |

NC-5a

SCF Energy: -326.886172051

Num. Imaginary Frequencies: 0

|   |           |           |           |
|---|-----------|-----------|-----------|
| C | -0.128999 | -0.405108 | -0.112393 |
| C | -0.497843 | 0.930430  | -0.371708 |
| C | -1.964919 | 1.080760  | -0.133552 |
| C | -2.355045 | -0.365950 | 0.279945  |
| N | -1.146086 | -1.188919 | 0.244557  |
| C | 1.210758  | -0.994021 | -0.271568 |
| C | 2.440980  | -0.365119 | -0.085707 |
| C | 2.684326  | 0.911371  | 0.390533  |
| H | 1.205870  | -2.048239 | -0.531636 |
| H | 3.314657  | -0.970413 | -0.325013 |
| H | 3.698518  | 1.285662  | 0.474007  |
| H | 1.887675  | 1.562021  | 0.731800  |
| H | 0.155190  | 1.707776  | -0.747147 |
| H | -2.185395 | 1.821507  | 0.648807  |
| H | -2.495671 | 1.425660  | -1.032274 |
| H | -2.788124 | -0.412133 | 1.287990  |
| H | -3.105663 | -0.803586 | -0.391735 |

NC-5b

SCF Energy: -326.890495751

Num. Imaginary Frequencies: 0

|   |           |           |           |
|---|-----------|-----------|-----------|
| C | 0.122765  | 0.393214  | -0.000140 |
| C | 1.314532  | 1.150979  | 0.000167  |
| C | 2.480637  | 0.222025  | 0.000172  |
| C | 1.765640  | -1.160106 | -0.000092 |
| N | 0.321778  | -0.923068 | -0.000253 |
| C | -1.192021 | 1.039786  | -0.000140 |
| C | -2.441544 | 0.419695  | -0.000007 |
| C | -2.696290 | -0.939659 | 0.000219  |
| H | -1.168284 | 2.126064  | -0.000370 |
| H | -3.299334 | 1.091853  | -0.000137 |
| H | -3.719225 | -1.302272 | 0.000318  |
| H | -1.883072 | -1.654238 | 0.000324  |
| H | 1.374948  | 2.233588  | 0.000243  |
| H | 3.126814  | 0.369772  | -0.877087 |
| H | 3.126652  | 0.369474  | 0.877596  |
| H | 2.033520  | -1.764106 | -0.877503 |
| H | 2.033224  | -1.764262 | 0.877303  |

NC-7a

SCF Energy: -326.963532724

Num. Imaginary Frequencies: 0

|   |           |           |           |
|---|-----------|-----------|-----------|
| C | 0.010472  | -0.757994 | 0.142856  |
| C | -0.000943 | 0.736238  | 0.426785  |
| C | 1.348582  | 1.126555  | -0.190765 |
| C | 2.141184  | -0.209101 | -0.038111 |
| N | 1.142153  | -1.303985 | -0.095324 |
| C | -1.372684 | -1.214704 | 0.013527  |
| C | -2.161091 | -0.130745 | -0.121833 |
| C | -1.388815 | 1.181436  | -0.082391 |
| H | -1.683473 | -2.250369 | -0.052717 |
| H | -3.232158 | -0.164928 | -0.299502 |
| H | -1.871343 | 1.934072  | 0.550506  |
| H | -1.332883 | 1.611177  | -1.093568 |
| H | 0.033567  | 0.875194  | 1.517792  |
| H | 1.227350  | 1.363814  | -1.254765 |
| H | 1.839781  | 1.975634  | 0.292674  |
| H | 2.894149  | -0.354495 | -0.819301 |
| H | 2.669710  | -0.252318 | 0.925742  |

NC-7b

SCF Energy: -326.950701091

Num. Imaginary Frequencies: 0

|   |           |           |           |
|---|-----------|-----------|-----------|
| C | 0.019090  | 0.768826  | -0.102892 |
| C | -1.223385 | 1.253115  | 0.081892  |
| C | -2.191572 | 0.086108  | -0.027884 |
| C | -1.252474 | -1.142168 | 0.142915  |
| N | 0.029587  | -0.625309 | -0.338734 |
| C | 1.408260  | 1.195928  | 0.001179  |
| C | 2.183795  | 0.099244  | 0.071885  |
| C | 1.338759  | -1.156846 | 0.020215  |
| H | 1.736506  | 2.226351  | 0.052746  |
| H | 3.262158  | 0.079977  | 0.181721  |
| H | 1.333367  | -1.663135 | 1.006365  |
| H | 1.703544  | -1.891776 | -0.711024 |
| H | -1.503218 | 2.287420  | 0.223493  |
| H | -2.988302 | 0.098467  | 0.723473  |
| H | -2.681063 | 0.058684  | -1.013818 |
| H | -1.183350 | -1.426104 | 1.208928  |
| H | -1.581586 | -2.017963 | -0.424602 |

NC-2

SCF Energy: -436.350322610

Num. Imaginary Frequencies: 1

|   |           |           |           |
|---|-----------|-----------|-----------|
| C | 2.107095  | 0.176485  | 0.676197  |
| C | 2.163548  | -1.246569 | 0.088859  |
| N | 1.215600  | 0.888895  | -0.245594 |
| N | 0.458640  | 1.820035  | 0.177452  |
| N | -0.641461 | 2.192547  | 0.097166  |
| C | 0.795884  | -1.555337 | -0.481335 |
| C | -0.067916 | -0.578196 | -0.692995 |
| C | -1.289831 | -0.017878 | -0.919593 |
| C | -2.466787 | -0.242090 | -0.073992 |
| C | -2.565297 | -1.077803 | 0.970203  |
| H | 0.556363  | -2.577152 | -0.770070 |
| H | -1.452706 | 0.504153  | -1.859763 |
| H | -3.339516 | 0.343177  | -0.358096 |
| H | -3.489899 | -1.166186 | 1.530113  |
| H | -1.728407 | -1.688459 | 1.296652  |
| H | 1.687080  | 0.155797  | 1.688971  |
| H | 3.098126  | 0.640171  | 0.708916  |
| H | 2.921002  | -1.307561 | -0.704460 |
| H | 2.458333  | -1.965963 | 0.860507  |

NC-4a

SCF Energy: -436.387941269

Num. Imaginary Frequencies: 1

|   |           |           |           |
|---|-----------|-----------|-----------|
| C | 0.193904  | -0.176568 | -0.468952 |
| C | 0.651118  | -1.423849 | -0.170814 |
| C | 2.117867  | -1.344219 | 0.143762  |
| C | 2.336307  | 0.199813  | 0.227658  |
| N | 1.168220  | 0.787950  | -0.442612 |
| C | -1.167766 | 0.260039  | -0.773955 |
| C | -2.321428 | -0.521145 | -0.350191 |
| C | -2.389635 | -1.234674 | 0.788563  |
| H | -1.279580 | 0.793421  | -1.715466 |
| H | -3.193825 | -0.485705 | -0.999763 |
| H | -3.271827 | -1.817537 | 1.032886  |
| H | -1.578095 | -1.241343 | 1.508545  |
| N | -1.000173 | 1.864711  | 0.293223  |
| N | 0.112878  | 2.082445  | 0.532135  |
| H | 0.080527  | -2.339482 | -0.265096 |
| H | 2.391860  | -1.906279 | 1.045327  |
| H | 2.719602  | -1.758279 | -0.677628 |
| H | 2.379475  | 0.535237  | 1.273597  |
| H | 3.263186  | 0.517844  | -0.258049 |



NC-4b

SCF Energy: -436.385810535

Num. Imaginary Frequencies: 1

|   |           |           |           |
|---|-----------|-----------|-----------|
| C | -0.275605 | -0.374616 | -0.370231 |
| C | -1.360415 | -0.983265 | -0.915703 |
| C | -2.562316 | -0.683401 | -0.067380 |
| C | -2.006390 | 0.442830  | 0.864955  |
| N | -0.542887 | 0.364180  | 0.757030  |
| C | 1.093259  | -0.305497 | -0.889922 |
| C | 2.237795  | -0.798269 | -0.114523 |
| C | 2.266594  | -0.940367 | 1.220501  |
| H | 1.180239  | -0.464295 | -1.962223 |
| H | 3.120052  | -1.054682 | -0.697720 |
| H | 3.145302  | -1.342520 | 1.714950  |
| H | 1.417733  | -0.654604 | 1.832890  |
| N | 1.169872  | 1.562667  | -0.742718 |
| N | 0.388716  | 1.960929  | 0.016437  |
| H | -1.355013 | -1.641569 | -1.776938 |
| H | -3.439429 | -0.399948 | -0.662231 |
| H | -2.859930 | -1.553716 | 0.534891  |
| H | -2.352174 | 1.430954  | 0.530227  |
| H | -2.324218 | 0.321469  | 1.904724  |

NC-6a

SCF Energy: -326.873697958

Num. Imaginary Frequencies: 1

|   |           |           |           |
|---|-----------|-----------|-----------|
| C | -0.053131 | -0.599393 | -0.139754 |
| C | -0.276079 | 0.759779  | -0.568249 |
| C | -1.689455 | 1.103742  | -0.208883 |
| C | -2.229722 | -0.277803 | 0.287196  |
| N | -1.094682 | -1.210445 | 0.357585  |
| C | 1.309359  | -1.116847 | -0.284059 |
| C | 2.303920  | -0.208439 | -0.040402 |
| C | 2.010075  | 1.049799  | 0.552916  |
| H | 1.494631  | -2.140821 | -0.589046 |
| H | 3.329765  | -0.424175 | -0.339082 |
| H | 2.682260  | 1.893760  | 0.424241  |
| H | 1.287532  | 1.132254  | 1.353942  |
| H | 0.297098  | 1.255391  | -1.339625 |
| H | -1.731999 | 1.866810  | 0.581902  |
| H | -2.248262 | 1.512574  | -1.059046 |
| H | -2.708163 | -0.213164 | 1.271394  |
| H | -2.989891 | -0.674546 | -0.400366 |

NC-6b

SCF Energy: -326.865002946

Num. Imaginary Frequencies: 1

|   |           |           |           |
|---|-----------|-----------|-----------|
| C | -0.073571 | 0.573172  | -0.203151 |
| C | -1.290356 | 1.170027  | 0.063710  |
| C | -2.342217 | 0.104640  | 0.136378  |
| C | -1.467268 | -1.188865 | 0.112259  |
| N | -0.156923 | -0.769964 | -0.399217 |
| C | 1.240568  | 1.186492  | -0.115088 |
| C | 2.273991  | 0.346878  | 0.152758  |
| C | 2.120872  | -1.082316 | 0.076785  |
| H | 1.336130  | 2.265954  | -0.062848 |
| H | 3.209356  | 0.754337  | 0.540424  |
| H | 2.603983  | -1.699223 | 0.835519  |
| H | 1.902840  | -1.575710 | -0.856912 |
| H | -1.474226 | 2.236167  | 0.132589  |
| H | -3.003531 | 0.200144  | 1.006458  |
| H | -2.989448 | 0.127252  | -0.753552 |
| H | -1.367335 | -1.600833 | 1.127457  |
| H | -1.891430 | -1.978503 | -0.516519 |

NC-8

SCF Energy: -326.882955991

Num. Imaginary Frequencies: 1

|   |           |           |           |
|---|-----------|-----------|-----------|
| C | -0.087597 | 0.247378  | -0.378400 |
| C | -0.889716 | 1.093898  | 0.403995  |
| C | -2.224767 | 0.448412  | 0.603730  |
| C | -2.030790 | -0.885145 | -0.170312 |
| N | -0.675303 | -0.896218 | -0.732418 |
| C | 1.289991  | 0.571527  | -0.829692 |
| C | 2.443264  | 0.146761  | -0.178723 |
| C | 2.488355  | -0.636161 | 0.961572  |
| H | 1.382329  | 1.176351  | -1.728274 |
| H | 3.391480  | 0.463286  | -0.611413 |
| H | 3.434079  | -0.922187 | 1.407705  |
| H | 1.582021  | -0.999891 | 1.433326  |
| H | -0.591619 | 2.057224  | 0.800517  |
| H | -2.454955 | 0.292928  | 1.667072  |
| H | -3.046285 | 1.057684  | 0.201002  |
| H | -2.150862 | -1.766219 | 0.473159  |
| H | -2.751506 | -1.005664 | -0.989195 |

phenyl-22

SCF Energy: -672.413769228

Num. Imaginary Frequencies: 0

|   |           |           |           |
|---|-----------|-----------|-----------|
| C | 2.208519  | 0.862093  | -0.107358 |
| C | 1.516638  | -0.379768 | 0.082912  |
| C | 2.195258  | -1.597482 | 0.202350  |
| C | 3.583491  | -1.572910 | 0.122359  |
| C | 4.284429  | -0.365775 | -0.075975 |
| C | 3.612413  | 0.843973  | -0.191142 |
| H | 1.660956  | -2.529485 | 0.358927  |
| H | 4.137816  | -2.502233 | 0.214373  |
| H | 5.368546  | -0.386104 | -0.136456 |
| H | 4.162677  | 1.769402  | -0.336980 |
| C | 1.225310  | 1.906784  | -0.164682 |
| C | -0.001114 | 1.292566  | -0.021916 |
| N | 0.174482  | -0.083186 | 0.098057  |
| C | -1.419824 | 1.580808  | 0.068112  |
| H | 1.410160  | 2.964637  | -0.283727 |
| C | -2.073524 | 0.398157  | 0.277288  |
| C | -2.003212 | 2.948124  | -0.101203 |
| C | -1.076276 | -0.743673 | 0.449587  |
| C | -3.471716 | 0.057891  | 0.226957  |
| C | -1.505457 | -1.989645 | -0.285417 |
| H | -1.028874 | -1.008521 | 1.524097  |
| H | -3.089743 | 2.942984  | 0.009975  |
| H | -1.588410 | 3.644032  | 0.637421  |
| H | -1.765006 | 3.354341  | -1.091238 |
| C | -2.823929 | -2.214635 | -0.445460 |
| H | -0.758290 | -2.725135 | -0.566777 |
| H | -3.166398 | -3.151555 | -0.876557 |
| C | -3.828102 | -1.215776 | -0.089772 |
| H | -4.225343 | 0.830186  | 0.351657  |
| H | -4.876889 | -1.484645 | -0.170950 |

phenyl-21  
SCF Energy: -672.401713830  
Num. Imaginary Frequencies: 0

|   |           |           |           |
|---|-----------|-----------|-----------|
| C | -1.598443 | -0.533048 | 0.185242  |
| C | -2.158526 | 0.759432  | 0.001803  |
| C | -3.524923 | 0.921345  | -0.219082 |
| C | -4.329693 | -0.221429 | -0.253772 |
| C | -3.783681 | -1.495595 | -0.067811 |
| C | -2.410523 | -1.657983 | 0.165633  |
| H | -3.939819 | 1.913241  | -0.365531 |
| H | -5.396850 | -0.118365 | -0.428894 |
| H | -4.429343 | -2.368026 | -0.103753 |
| H | -1.997744 | -2.651805 | 0.318754  |
| C | -0.145488 | -0.305137 | 0.495117  |
| C | -0.061650 | 1.193059  | 0.259436  |
| N | -1.188428 | 1.793880  | 0.021708  |
| C | 1.320971  | 1.593953  | 0.087556  |
| H | 0.044802  | -0.518869 | 1.556151  |
| C | 2.033293  | 0.448524  | -0.161354 |
| C | 1.790290  | 3.014359  | 0.109416  |
| C | 1.114775  | -0.776025 | -0.298987 |
| C | 3.455773  | 0.259999  | -0.276067 |
| C | 1.787467  | -2.069390 | 0.055857  |
| H | 0.809025  | -0.846192 | -1.356655 |
| H | 2.823102  | 3.114885  | -0.233070 |
| H | 1.148381  | 3.628200  | -0.531798 |
| H | 1.723501  | 3.438082  | 1.118501  |
| C | 3.131986  | -2.154644 | 0.075596  |
| H | 1.169585  | -2.948649 | 0.220331  |
| H | 3.617134  | -3.106733 | 0.272511  |
| C | 3.976011  | -0.991009 | -0.167069 |
| H | 4.109290  | 1.123302  | -0.364091 |
| H | 5.052094  | -1.134701 | -0.203494 |

(Z)-18→phenyl-22

SCF Energy: -672.377929291

Num. Imaginary Frequencies: 1

|   |           |           |           |
|---|-----------|-----------|-----------|
| C | 2.316031  | 0.795514  | 0.020206  |
| C | 1.614749  | -0.465866 | -0.125047 |
| C | 2.329298  | -1.683594 | -0.228924 |
| C | 3.704395  | -1.639285 | -0.158389 |
| C | 4.403496  | -0.404914 | -0.007941 |
| C | 3.733818  | 0.795907  | 0.074514  |
| H | 1.797291  | -2.622414 | -0.349012 |
| H | 4.276051  | -2.560709 | -0.222194 |
| H | 5.488660  | -0.421045 | 0.038557  |
| H | 4.278437  | 1.728997  | 0.190879  |
| C | 1.332538  | 1.803570  | 0.045279  |
| C | 0.097458  | 1.136934  | -0.044957 |
| N | 0.286295  | -0.244355 | -0.225930 |
| C | -1.252676 | 1.534155  | 0.091008  |
| H | 1.483202  | 2.864017  | 0.195251  |
| C | -2.097172 | 0.428092  | 0.272370  |
| C | -1.697259 | 2.956048  | -0.077090 |
| C | -1.400866 | -0.799382 | 0.661085  |
| C | -3.449633 | 0.359309  | -0.168890 |
| C | -2.046854 | -2.047201 | 0.374692  |
| H | -0.797996 | -0.762295 | 1.563020  |
| H | -2.698959 | 3.123093  | 0.324742  |
| H | -1.006794 | 3.632431  | 0.436398  |
| H | -1.696411 | 3.245826  | -1.134908 |
| C | -3.323683 | -2.060444 | -0.126795 |
| H | -1.546057 | -2.975253 | 0.631261  |
| H | -3.817918 | -3.013816 | -0.295578 |
| C | -4.051707 | -0.857649 | -0.371296 |
| H | -3.967008 | 1.278109  | -0.429101 |
| H | -5.068146 | -0.913617 | -0.746735 |

(E)-18→phenyl-21

SCF Energy: -672.375910819

Num. Imaginary Frequencies: 1

|   |           |           |           |
|---|-----------|-----------|-----------|
| C | 1.684296  | -0.560958 | -0.314220 |
| C | 2.202101  | 0.714343  | 0.103062  |
| C | 3.573585  | 0.855921  | 0.386722  |
| C | 4.397503  | -0.246542 | 0.225082  |
| C | 3.894901  | -1.495739 | -0.213462 |
| C | 2.546997  | -1.658505 | -0.488842 |
| H | 3.961830  | 1.813812  | 0.717501  |
| H | 5.459942  | -0.153213 | 0.433533  |
| H | 4.578028  | -2.331453 | -0.331636 |
| H | 2.161828  | -2.619482 | -0.819966 |
| C | 0.285966  | -0.346467 | -0.537851 |
| C | 0.104627  | 1.086940  | -0.163669 |
| N | 1.235374  | 1.697861  | 0.180700  |
| C | -1.234619 | 1.543007  | -0.046588 |
| H | -0.233023 | -0.789573 | -1.379132 |
| C | -2.085550 | 0.450656  | 0.178422  |
| C | -1.614037 | 2.987663  | -0.138360 |
| C | -1.399718 | -0.758700 | 0.647900  |
| C | -3.469274 | 0.375963  | -0.162147 |
| C | -2.091796 | -2.011973 | 0.531330  |
| H | -0.736260 | -0.655603 | 1.499243  |
| H | -2.599426 | 3.187844  | 0.289214  |
| H | -0.865890 | 3.585243  | 0.392444  |
| H | -1.611740 | 3.335504  | -1.178909 |
| C | -3.387903 | -2.045680 | 0.089256  |
| H | -1.595389 | -2.922919 | 0.852639  |
| H | -3.913244 | -2.994573 | 0.026044  |
| C | -4.095460 | -0.842463 | -0.224305 |
| H | -3.991669 | 1.280505  | -0.459749 |
| H | -5.132318 | -0.905908 | -0.540108 |



phenyl-(Z)-18

SCF Energy: -672.414957160

Num. Imaginary Frequencies: 0

|   |           |           |           |
|---|-----------|-----------|-----------|
| C | 2.566829  | 0.713487  | 0.066587  |
| C | 1.990196  | -0.629269 | -0.097184 |
| C | 2.862332  | -1.756577 | -0.233848 |
| C | 4.211561  | -1.541760 | -0.199733 |
| C | 4.778164  | -0.223115 | -0.034455 |
| C | 3.988004  | 0.883197  | 0.095953  |
| H | 2.440309  | -2.748539 | -0.358728 |
| H | 4.892718  | -2.382515 | -0.299143 |
| H | 5.859608  | -0.124706 | -0.016315 |
| H | 4.422319  | 1.871386  | 0.219644  |
| C | 1.490485  | 1.562326  | 0.156405  |
| C | 0.303069  | 0.717328  | 0.053036  |
| N | 0.666939  | -0.625753 | -0.105136 |
| C | -1.011565 | 1.151109  | 0.080002  |
| H | 1.522757  | 2.633902  | 0.290370  |
| C | -2.180182 | 0.254145  | 0.035308  |
| C | -1.303805 | 2.631543  | 0.133316  |
| C | -2.123142 | -1.091642 | 0.462995  |
| C | -3.428142 | 0.748317  | -0.406581 |
| C | -3.257768 | -1.895863 | 0.436216  |
| H | -1.175688 | -1.488179 | 0.799883  |
| C | -4.477620 | -1.391857 | -0.019570 |
| H | -3.188602 | -2.924656 | 0.777154  |
| H | -5.359522 | -2.025588 | -0.040116 |
| C | -4.556248 | -0.064812 | -0.444854 |
| H | -3.517359 | 1.773709  | -0.746318 |
| H | -5.497839 | 0.339308  | -0.804606 |
| H | -2.074606 | 2.850319  | 0.878497  |
| H | -0.420937 | 3.222046  | 0.367354  |
| H | -1.684744 | 2.984446  | -0.833280 |

phenyl-(E)-18

SCF Energy: -672.417118706

Num. Imaginary Frequencies: 0

|   |           |           |           |
|---|-----------|-----------|-----------|
| C | 2.059523  | -0.768051 | -0.187935 |
| C | 2.446617  | 0.621076  | 0.112626  |
| C | 3.835566  | 0.954821  | 0.221448  |
| C | 4.758561  | -0.033539 | 0.027497  |
| C | 4.378910  | -1.393918 | -0.278757 |
| C | 3.069126  | -1.763866 | -0.388093 |
| H | 4.124044  | 1.975748  | 0.449747  |
| H | 5.817778  | 0.197403  | 0.101526  |
| H | 5.165592  | -2.128974 | -0.421726 |
| H | 2.793030  | -2.789374 | -0.617193 |
| C | 0.685780  | -0.767083 | -0.215476 |
| C | 0.288102  | 0.610557  | 0.060384  |
| N | 1.409097  | 1.431138  | 0.245113  |
| C | -0.986765 | 1.133881  | 0.089159  |
| H | 0.026605  | -1.587993 | -0.457380 |
| C | -2.193320 | 0.287581  | 0.045048  |
| C | -1.173838 | 2.623262  | 0.168795  |
| C | -2.273060 | -0.912383 | 0.780142  |
| C | -3.325326 | 0.689478  | -0.691956 |
| C | -3.427290 | -1.691868 | 0.753091  |
| H | -1.434730 | -1.206883 | 1.401178  |
| C | -4.528296 | -1.292706 | -0.005986 |
| H | -3.470432 | -2.606757 | 1.336592  |
| H | -5.427644 | -1.900935 | -0.026269 |
| C | -4.472130 | -0.098352 | -0.727974 |
| H | -3.295283 | 1.612101  | -1.262117 |
| H | -5.325329 | 0.221278  | -1.318905 |
| H | -1.900381 | 2.884700  | 0.945487  |
| H | -0.217712 | 3.108515  | 0.359854  |
| H | -1.572182 | 3.009859  | -0.778667 |

phenyl-tau-14  
SCF Energy: -672.430536982  
Num. Imaginary Frequencies: 0

|   |           |           |           |
|---|-----------|-----------|-----------|
| C | 2.113166  | -0.715698 | -0.303882 |
| C | 2.467437  | 0.557059  | 0.185100  |
| C | 3.796220  | 0.893622  | 0.435835  |
| C | 4.773863  | -0.073028 | 0.184841  |
| C | 4.427050  | -1.339144 | -0.300436 |
| C | 3.088152  | -1.672420 | -0.548063 |
| H | 4.051281  | 1.878636  | 0.812705  |
| H | 5.818493  | 0.160662  | 0.368901  |
| H | 5.205274  | -2.073207 | -0.487387 |
| H | 2.829569  | -2.658670 | -0.924272 |
| C | 0.616730  | -0.712721 | -0.441974 |
| C | 0.292778  | 0.702802  | 0.028690  |
| N | 1.342046  | 1.386913  | 0.374077  |
| C | -1.065722 | 1.286109  | 0.018160  |
| H | 0.268625  | -0.868566 | -1.471791 |
| C | -2.247377 | 0.376139  | 0.046135  |
| C | -1.217911 | 2.621365  | -0.046663 |
| C | -2.371871 | -0.620974 | 1.028153  |
| C | -3.281749 | 0.521165  | -0.891452 |
| C | -3.496857 | -1.443015 | 1.072665  |
| H | -1.594201 | -0.732123 | 1.778735  |
| H | -0.351995 | 3.272103  | -0.092972 |
| H | -2.202950 | 3.076075  | -0.034636 |
| C | -4.517657 | -1.288038 | 0.132613  |
| H | -3.579475 | -2.200833 | 1.846441  |
| H | -5.392072 | -1.931238 | 0.165138  |
| C | -4.406789 | -0.302190 | -0.848564 |
| H | -3.190122 | 1.277821  | -1.664967 |
| H | -5.193926 | -0.177122 | -1.586573 |
| H | 0.120403  | -1.478124 | 0.165184  |

phenyl-14  
SCF Energy: -672.447326082  
Num. Imaginary Frequencies: 0

|   |           |           |           |
|---|-----------|-----------|-----------|
| C | 2.082144  | -0.683480 | -0.337120 |
| C | 2.505716  | 0.569797  | 0.189647  |
| C | 3.847460  | 0.845542  | 0.472732  |
| C | 4.776377  | -0.154316 | 0.209176  |
| C | 4.381730  | -1.399225 | -0.324537 |
| C | 3.048857  | -1.671382 | -0.599604 |
| H | 4.154188  | 1.805070  | 0.879245  |
| H | 5.826880  | 0.027637  | 0.415633  |
| H | 5.136788  | -2.154532 | -0.521093 |
| H | 2.753257  | -2.633124 | -1.009228 |
| C | 0.658784  | -0.615078 | -0.472609 |
| C | 0.253296  | 0.636282  | -0.051309 |
| N | 1.381881  | 1.354517  | 0.331700  |
| C | -1.081225 | 1.242534  | -0.029724 |
| H | 0.006482  | -1.381331 | -0.864417 |
| C | -2.262738 | 0.334210  | 0.025152  |
| C | -1.245696 | 2.581514  | -0.058001 |
| C | -2.286239 | -0.784531 | 0.874733  |
| C | -3.398678 | 0.602679  | -0.756056 |
| C | -3.416280 | -1.597400 | 0.950987  |
| H | -1.416727 | -1.007674 | 1.483956  |
| H | 1.346689  | 2.235591  | 0.818070  |
| H | -0.409375 | 3.262880  | -0.177651 |
| H | -2.229657 | 3.028514  | 0.023424  |
| C | -4.541237 | -1.314433 | 0.174361  |
| H | -3.418381 | -2.452248 | 1.621166  |
| H | -5.418969 | -1.951587 | 0.230989  |
| C | -4.527226 | -0.211950 | -0.681464 |
| H | -3.382281 | 1.445556  | -1.440109 |
| H | -5.392334 | 0.009042  | -1.300063 |

phenyl-(Z)-18→tau-14  
SCF Energy: -672.343949778  
Num. Imaginary Frequencies: 1

|   |           |           |           |
|---|-----------|-----------|-----------|
| C | -1.037107 | 0.944840  | -0.256170 |
| C | -0.879060 | 2.344955  | -0.479549 |
| C | -2.296704 | 0.240792  | -0.071082 |
| C | -3.531374 | 0.859526  | -0.360741 |
| C | -4.729623 | 0.184426  | -0.155935 |
| C | -4.721775 | -1.129637 | 0.319793  |
| C | -3.506241 | -1.765308 | 0.588305  |
| C | -2.305900 | -1.089310 | 0.402066  |
| H | -1.694781 | 3.028339  | -0.239359 |
| H | -0.352916 | 2.631729  | -1.392205 |
| H | 0.421602  | 2.343027  | 0.074289  |
| H | -3.543534 | 1.865260  | -0.767476 |
| H | -5.671176 | 0.675942  | -0.381802 |
| H | -5.658120 | -1.658976 | 0.469853  |
| H | -3.496458 | -2.789341 | 0.949164  |
| H | -1.361117 | -1.580584 | 0.606537  |
| C | 0.265971  | 0.352024  | -0.102401 |
| C | 1.233130  | 1.263325  | 0.578012  |
| N | 0.809521  | -0.737460 | -0.615031 |
| C | 2.491245  | 0.596740  | 0.357143  |
| C | 2.165498  | -0.610310 | -0.348510 |
| C | 3.818782  | 0.852447  | 0.742846  |
| C | 4.802881  | -0.056121 | 0.385725  |
| C | 4.481642  | -1.228615 | -0.337981 |
| C | 3.177433  | -1.517336 | -0.708484 |
| H | 1.003418  | 1.643575  | 1.575572  |
| H | 4.072096  | 1.754376  | 1.293594  |
| H | 5.836863  | 0.131324  | 0.659934  |
| H | 5.278154  | -1.918798 | -0.602042 |
| H | 2.926542  | -2.418282 | -1.259071 |

phenyl-(E)-18→14

SCF Energy: -672.371222127

Num. Imaginary Frequencies: 1

|   |           |           |           |
|---|-----------|-----------|-----------|
| C | 2.203606  | -0.762230 | -0.336252 |
| C | 2.422884  | 0.559640  | 0.219894  |
| C | 3.723875  | 0.989719  | 0.570369  |
| C | 4.775834  | 0.132662  | 0.329210  |
| C | 4.575881  | -1.160447 | -0.238594 |
| C | 3.316752  | -1.611548 | -0.566170 |
| H | 3.878888  | 1.973287  | 1.002673  |
| H | 5.786945  | 0.444281  | 0.575642  |
| H | 5.439607  | -1.796021 | -0.410539 |
| H | 3.174323  | -2.596983 | -1.001395 |
| C | 0.811378  | -0.905137 | -0.502485 |
| C | 0.252292  | 0.319422  | -0.089679 |
| N | 1.234933  | 1.181507  | 0.380593  |
| C | -1.016693 | 0.964664  | -0.145833 |
| H | 0.283783  | -1.729407 | -0.962111 |
| C | -2.290465 | 0.259736  | -0.019792 |
| C | -0.860250 | 2.388347  | -0.161650 |
| C | -2.360573 | -1.025514 | 0.556475  |
| C | -3.481491 | 0.859550  | -0.475685 |
| C | -3.579170 | -1.687621 | 0.663811  |
| H | -1.453418 | -1.481420 | 0.938021  |
| H | 0.394254  | 2.242169  | 0.431672  |
| H | -0.356925 | 2.808516  | -1.035089 |
| H | -1.692249 | 3.000638  | 0.180298  |
| C | -4.750902 | -1.079244 | 0.205500  |
| H | -3.619638 | -2.673970 | 1.115988  |
| H | -5.701900 | -1.596442 | 0.293180  |
| C | -4.699057 | 0.196007  | -0.363594 |
| H | -3.434033 | 1.839013  | -0.940105 |
| H | -5.607576 | 0.667750  | -0.725544 |

phenyl-(E)-18→phenyl-(Z)-18

SCF Energy: -672.371274039

Num. Imaginary Frequencies: 1

|   |           |           |           |
|---|-----------|-----------|-----------|
| C | 2.362216  | 0.153128  | 0.751136  |
| C | 2.235031  | -0.035917 | -0.660604 |
| C | 3.296174  | -0.494328 | -1.414021 |
| C | 4.513075  | -0.770301 | -0.750542 |
| C | 4.649199  | -0.590358 | 0.628603  |
| C | 3.573717  | -0.126531 | 1.397848  |
| H | 3.194129  | -0.637309 | -2.484902 |
| H | 5.360110  | -1.130261 | -1.327127 |
| H | 5.597653  | -0.811734 | 1.107765  |
| H | 3.681647  | 0.011793  | 2.470060  |
| C | 1.086258  | 0.615668  | 1.167872  |
| C | 0.271535  | 0.677114  | -0.036202 |
| N | 0.937660  | 0.295836  | -1.112700 |
| C | -1.129156 | 1.162936  | -0.085762 |
| H | 0.763835  | 0.869373  | 2.170413  |
| C | -2.224062 | 0.250237  | -0.025748 |
| C | -1.334106 | 2.650382  | -0.212868 |
| C | -2.014785 | -1.156149 | 0.070962  |
| C | -3.574811 | 0.702493  | -0.055017 |
| C | -3.081552 | -2.038969 | 0.141943  |
| H | -0.999613 | -1.537674 | 0.074863  |
| C | -4.400339 | -1.567799 | 0.116646  |
| H | -2.889111 | -3.105836 | 0.213387  |
| H | -5.232762 | -2.262694 | 0.171170  |
| C | -4.633954 | -0.191118 | 0.015032  |
| H | -3.781644 | 1.764096  | -0.135679 |
| H | -5.653221 | 0.184439  | -0.010155 |
| H | -1.806505 | 2.910303  | -1.170612 |
| H | -1.982747 | 3.048218  | 0.578922  |
| H | -0.382033 | 3.183504  | -0.164872 |

22

SCF Energy: -518.774131145

Num. Imaginary Frequencies: 0

|   |           |           |           |
|---|-----------|-----------|-----------|
| C | 1.068291  | -0.945830 | 0.000104  |
| C | 0.902312  | 0.477560  | -0.000025 |
| C | 1.990006  | 1.355970  | -0.000079 |
| C | 3.265651  | 0.800919  | -0.000058 |
| C | 3.455152  | -0.595626 | 0.000020  |
| C | 2.373451  | -1.467828 | 0.000082  |
| H | 1.846066  | 2.432387  | -0.000146 |
| H | 4.131341  | 1.456733  | -0.000112 |
| H | 4.465676  | -0.993554 | 0.000024  |
| H | 2.532041  | -2.542786 | 0.000141  |
| C | -0.242138 | -1.540159 | -0.000005 |
| C | -1.136821 | -0.495223 | -0.000118 |
| N | -0.452260 | 0.711758  | -0.000134 |
| C | -2.564732 | -0.187816 | -0.000189 |
| H | -0.475222 | -2.595112 | -0.000016 |
| C | -2.700771 | 1.156403  | -0.000152 |
| C | -3.642876 | -1.225879 | 0.000054  |
| C | -1.354312 | 1.851245  | 0.000244  |
| H | -3.635883 | 1.703208  | 0.000088  |
| H | -1.208607 | 2.484681  | 0.886775  |
| H | -1.208601 | 2.485761  | -0.885477 |
| H | -4.635491 | -0.769056 | 0.000092  |
| H | -3.562490 | -1.873635 | -0.880489 |
| H | -3.562289 | -1.873349 | 0.880793  |



21

SCF Energy: -518.757119144

Num. Imaginary Frequencies: 0

|   |           |           |           |
|---|-----------|-----------|-----------|
| C | 0.967345  | 0.584588  | 0.170160  |
| C | 0.996053  | -0.828056 | 0.034777  |
| C | 2.197289  | -1.505994 | -0.151286 |
| C | 3.377713  | -0.756558 | -0.205321 |
| C | 3.355347  | 0.634432  | -0.069634 |
| C | 2.145541  | 1.315237  | 0.133467  |
| H | 2.204400  | -2.585905 | -0.257199 |
| H | 4.326409  | -1.263639 | -0.356512 |
| H | 4.284178  | 1.194767  | -0.121993 |
| H | 2.139666  | 2.396051  | 0.247938  |
| C | -0.466645 | 0.934158  | 0.469955  |
| C | -1.107512 | -0.420988 | 0.255363  |
| N | -0.301772 | -1.413620 | 0.057873  |
| C | -2.539537 | -0.249592 | 0.011872  |
| H | -0.544643 | 1.187836  | 1.538457  |
| C | -2.722766 | 1.053808  | -0.300243 |
| C | -3.534244 | -1.367033 | -0.002811 |
| C | -1.438178 | 1.871279  | -0.296602 |
| H | -3.678987 | 1.485135  | -0.583828 |
| H | -1.559086 | 2.856157  | 0.166795  |
| H | -1.091667 | 2.039447  | -1.324199 |
| H | -4.517978 | -1.027507 | -0.336872 |
| H | -3.191742 | -2.166415 | -0.668785 |
| H | -3.640585 | -1.812269 | 0.992915  |

(Z)-18→22

SCF Energy: -518.701721584

Num. Imaginary Frequencies: 1

|   |           |           |           |
|---|-----------|-----------|-----------|
| C | -1.120722 | -0.890683 | 0.085825  |
| C | -0.936579 | 0.534874  | -0.150979 |
| C | -2.061958 | 1.395195  | -0.267449 |
| C | -3.315250 | 0.853694  | -0.113451 |
| C | -3.502341 | -0.543232 | 0.135787  |
| C | -2.437091 | -1.407279 | 0.229703  |
| H | -1.917514 | 2.454358  | -0.457882 |
| H | -4.190940 | 1.492691  | -0.183502 |
| H | -4.514658 | -0.921302 | 0.247334  |
| H | -2.594487 | -2.465689 | 0.419209  |
| C | 0.160254  | -1.459851 | 0.066789  |
| C | 1.056561  | -0.381416 | -0.114996 |
| N | 0.361188  | 0.823123  | -0.324440 |
| C | 2.464252  | -0.309227 | -0.044386 |
| H | 0.426194  | -2.490067 | 0.261786  |
| C | 2.948889  | 1.000783  | 0.067371  |
| C | 3.347562  | -1.515025 | -0.172268 |
| C | 2.059537  | 1.979563  | 0.500643  |
| H | 3.914474  | 1.272341  | -0.353498 |
| H | 2.202411  | 3.022340  | 0.222522  |
| H | 1.417646  | 1.815119  | 1.354036  |
| H | 4.328874  | -1.239800 | -0.569690 |
| H | 3.516918  | -1.968823 | 0.812624  |
| H | 2.904072  | -2.277411 | -0.817392 |

(E)-18→21

SCF Energy: -518.701737643

Num. Imaginary Frequencies: 1

|   |           |           |           |
|---|-----------|-----------|-----------|
| C | -1.020743 | 0.625534  | -0.257356 |
| C | -1.035011 | -0.771853 | 0.106177  |
| C | -2.261633 | -1.412928 | 0.370607  |
| C | -3.428573 | -0.678939 | 0.247947  |
| C | -3.419999 | 0.688780  | -0.134121 |
| C | -2.230870 | 1.342383  | -0.391937 |
| H | -2.274434 | -2.460061 | 0.655308  |
| H | -4.383415 | -1.160406 | 0.441632  |
| H | -4.362902 | 1.220187  | -0.220636 |
| H | -2.223844 | 2.391071  | -0.677432 |
| C | 0.341035  | 0.933213  | -0.479692 |
| C | 1.045808  | -0.331815 | -0.161115 |
| N | 0.219216  | -1.334956 | 0.143263  |
| C | 2.466569  | -0.334076 | -0.108902 |
| H | 0.701546  | 1.677199  | -1.176282 |
| C | 2.972803  | 0.934470  | 0.172196  |
| C | 3.276081  | -1.576010 | -0.313994 |
| C | 2.106595  | 1.863309  | 0.766189  |
| H | 3.984396  | 1.222742  | -0.111279 |
| H | 2.314060  | 2.930614  | 0.711868  |
| H | 1.429808  | 1.564559  | 1.553887  |
| H | 4.348754  | -1.380286 | -0.242966 |
| H | 3.001833  | -2.313925 | 0.448830  |
| H | 3.057324  | -2.039401 | -1.281768 |

(Z)-18

SCF Energy: -518.724414059

Num. Imaginary Frequencies: 0

|   |           |           |           |
|---|-----------|-----------|-----------|
| C | -1.250350 | -0.833340 | -0.000006 |
| C | -1.001322 | 0.616456  | 0.000019  |
| C | -2.111797 | 1.518635  | 0.000030  |
| C | -3.374742 | 0.994847  | 0.000012  |
| C | -3.619923 | -0.428333 | -0.000014 |
| C | -2.593080 | -1.329091 | -0.000021 |
| H | -1.933449 | 2.589096  | 0.000052  |
| H | -4.232692 | 1.661738  | 0.000019  |
| H | -4.649022 | -0.775254 | -0.000026 |
| H | -2.784836 | -2.398523 | -0.000036 |
| C | -0.005300 | -1.414790 | -0.000015 |
| C | 0.950524  | -0.310865 | -0.000002 |
| N | 0.288611  | 0.918720  | 0.000026  |
| C | 2.329369  | -0.425615 | -0.000009 |
| H | 0.218092  | -2.472079 | -0.000071 |
| C | 3.274314  | 0.688850  | 0.000034  |
| C | 2.996809  | -1.777324 | 0.000015  |
| C | 3.010343  | 2.008668  | -0.000064 |
| H | 4.319446  | 0.379715  | 0.000121  |
| H | 3.829575  | 2.722255  | -0.000022 |
| H | 1.990290  | 2.372719  | -0.000188 |
| H | 2.298085  | -2.611469 | -0.000132 |
| H | 3.647722  | -1.873862 | -0.877970 |
| H | 3.647448  | -1.873953 | 0.878197  |

(E)-18

SCF Energy: -518.725074466

Num. Imaginary Frequencies: 0

|   |           |           |           |
|---|-----------|-----------|-----------|
| C | 1.093835  | -0.742376 | -0.135467 |
| C | 1.151462  | 0.714563  | 0.079085  |
| C | 2.425717  | 1.351793  | 0.227800  |
| C | 3.550803  | 0.580403  | 0.153167  |
| C | 3.494784  | -0.846946 | -0.067012 |
| C | 2.305685  | -1.502176 | -0.210627 |
| H | 2.471902  | 2.423409  | 0.392368  |
| H | 4.528134  | 1.043176  | 0.260076  |
| H | 4.429303  | -1.398139 | -0.115949 |
| H | 2.272761  | -2.575800 | -0.373746 |
| C | -0.242335 | -1.043789 | -0.239998 |
| C | -0.943523 | 0.226927  | -0.078827 |
| N | -0.042871 | 1.284443  | 0.096012  |
| C | -2.302175 | 0.449557  | -0.116768 |
| H | -0.694404 | -1.999499 | -0.460774 |
| C | -3.292015 | -0.626942 | -0.160485 |
| C | -2.844428 | 1.850505  | -0.133111 |
| C | -3.241815 | -1.772568 | 0.536569  |
| H | -4.183659 | -0.417431 | -0.752485 |
| H | -4.040643 | -2.504474 | 0.467725  |
| H | -2.424078 | -1.992481 | 1.214439  |
| H | -2.034766 | 2.575851  | -0.071315 |
| H | -3.416084 | 2.017503  | -1.055905 |
| H | -3.544333 | 2.003066  | 0.697520  |

tau-14

SCF Energy: -518.741355790

Num. Imaginary Frequencies: 0

|   |           |           |           |
|---|-----------|-----------|-----------|
| C | -1.307125 | -0.807291 | 0.000031  |
| C | -1.013448 | 0.568626  | -0.000032 |
| C | -2.022800 | 1.528162  | -0.000066 |
| C | -3.347495 | 1.081693  | -0.000038 |
| C | -3.645542 | -0.285333 | 0.000023  |
| C | -2.623316 | -1.245284 | 0.000058  |
| H | -1.777149 | 2.585026  | -0.000112 |
| H | -4.157324 | 1.805341  | -0.000063 |
| H | -4.682547 | -0.607799 | 0.000044  |
| H | -2.866737 | -2.304392 | 0.000106  |
| C | 0.015652  | -1.522403 | 0.000051  |
| C | 0.982816  | -0.335543 | -0.000008 |
| N | 0.376591  | 0.813465  | -0.000051 |
| C | 2.449886  | -0.489830 | -0.000028 |
| H | 0.158681  | -2.159441 | 0.881351  |
| C | 3.378867  | 0.656993  | -0.000025 |
| C | 2.975798  | -1.735710 | -0.000060 |
| C | 3.103968  | 1.966971  | 0.000127  |
| H | 4.425219  | 0.352275  | -0.000168 |
| H | 3.917952  | 2.686255  | 0.000115  |
| H | 2.088586  | 2.339195  | 0.000245  |
| H | 0.158664  | -2.159522 | -0.881197 |
| H | 4.050311  | -1.886999 | -0.000079 |
| H | 2.364638  | -2.630489 | -0.000074 |

14

SCF Energy: -518.755389437

Num. Imaginary Frequencies: 0

|   |           |           |           |
|---|-----------|-----------|-----------|
| C | -1.093629 | 0.680514  | -0.271416 |
| C | -1.194746 | -0.668610 | 0.170966  |
| C | -2.423235 | -1.268705 | 0.466093  |
| C | -3.568436 | -0.499005 | 0.299034  |
| C | -3.494142 | 0.835655  | -0.151771 |
| C | -2.272670 | 1.429624  | -0.437848 |
| H | -2.482204 | -2.297976 | 0.808404  |
| H | -4.539056 | -0.934621 | 0.516698  |
| H | -4.410739 | 1.404945  | -0.274471 |
| H | -2.225228 | 2.458725  | -0.782659 |
| C | 0.301482  | 0.956202  | -0.446604 |
| C | 1.000555  | -0.190954 | -0.130478 |
| N | 0.085479  | -1.176587 | 0.223743  |
| C | 2.437143  | -0.499161 | -0.199504 |
| H | 0.738821  | 1.873194  | -0.812160 |
| C | 3.432887  | 0.533494  | 0.138578  |
| C | 2.858331  | -1.730665 | -0.561628 |
| C | 3.212770  | 1.694259  | 0.767965  |
| H | 4.453562  | 0.278079  | -0.142250 |
| H | 4.033571  | 2.371467  | 0.981410  |
| H | 2.224740  | 1.995353  | 1.097230  |
| H | 0.348077  | -2.060974 | 0.628314  |
| H | 3.915136  | -1.975565 | -0.588811 |
| H | 2.167111  | -2.512403 | -0.858241 |

(Z)-18→tau-14

SCF Energy: -518.651365043

Num. Imaginary Frequencies: 1

|   |           |           |           |
|---|-----------|-----------|-----------|
| C | -1.199247 | 0.712785  | -0.223234 |
| C | -1.040947 | -0.649172 | 0.200034  |
| C | -2.166874 | -1.456897 | 0.429188  |
| C | -3.423245 | -0.912151 | 0.208189  |
| C | -3.583523 | 0.419941  | -0.238014 |
| C | -2.482715 | 1.232495  | -0.463687 |
| H | -2.040309 | -2.480801 | 0.765900  |
| H | -4.307196 | -1.521541 | 0.374783  |
| H | -4.584472 | 0.807881  | -0.402255 |
| H | -2.611506 | 2.257206  | -0.801765 |
| C | 0.139650  | 1.222658  | -0.385117 |
| C | 0.974939  | 0.059709  | 0.035172  |
| N | 0.290161  | -1.022593 | 0.349363  |
| C | 2.359587  | 0.415290  | 0.200461  |
| H | 0.392041  | 1.764899  | -1.298526 |
| C | 3.492314  | -0.388131 | -0.199654 |
| C | 2.442606  | 1.742210  | 0.710299  |
| C | 3.392315  | -1.668316 | -0.604640 |
| H | 4.471045  | 0.079691  | -0.112348 |
| H | 4.276534  | -2.248843 | -0.846421 |
| H | 2.427791  | -2.162239 | -0.665344 |
| H | 2.009173  | 1.908066  | 1.698697  |
| H | 3.360985  | 2.314267  | 0.563467  |
| H | 1.145627  | 2.057038  | 0.264276  |



(E)-18→14

SCF Energy: -518.676340880

Num. Imaginary Frequencies: 1

|   |           |           |           |
|---|-----------|-----------|-----------|
| C | 1.105535  | -0.770921 | -0.220757 |
| C | 1.116505  | 0.632860  | 0.144787  |
| C | 2.333838  | 1.299991  | 0.414847  |
| C | 3.506039  | 0.587921  | 0.279002  |
| C | 3.509892  | -0.786357 | -0.102664 |
| C | 2.336701  | -1.464644 | -0.347348 |
| H | 2.333843  | 2.345838  | 0.705527  |
| H | 4.455958  | 1.080731  | 0.465932  |
| H | 4.461714  | -1.300647 | -0.197780 |
| H | 2.349449  | -2.510784 | -0.640978 |
| C | -0.247647 | -1.145350 | -0.347459 |
| C | -0.988999 | 0.024780  | -0.098322 |
| N | -0.153785 | 1.084319  | 0.232656  |
| C | -2.340906 | 0.458054  | -0.215037 |
| H | -0.639103 | -2.093124 | -0.690412 |
| C | -3.498635 | -0.383897 | 0.048720  |
| C | -2.408032 | 1.867397  | -0.444574 |
| C | -3.444313 | -1.582284 | 0.654910  |
| H | -4.460811 | 0.013205  | -0.267042 |
| H | -4.338940 | -2.178988 | 0.801825  |
| H | -2.508240 | -1.986528 | 1.026451  |
| H | -1.157219 | 2.006942  | 0.146794  |
| H | -1.963210 | 2.227347  | -1.374776 |
| H | -3.336820 | 2.380472  | -0.200763 |

(E)-18→(Z)-18

SCF Energy: -518.685436609

Num. Imaginary Frequencies: 1

|   |           |           |           |
|---|-----------|-----------|-----------|
| C | 1.194167  | -0.558442 | -0.535943 |
| C | 1.096130  | 0.375174  | 0.542705  |
| C | 2.223870  | 0.964728  | 1.075897  |
| C | 3.478877  | 0.618596  | 0.525920  |
| C | 3.587212  | -0.292185 | -0.528306 |
| C | 2.444341  | -0.892440 | -1.073600 |
| H | 2.144295  | 1.673504  | 1.893792  |
| H | 4.377922  | 1.072068  | 0.932832  |
| H | 4.566248  | -0.536356 | -0.928352 |
| H | 2.530906  | -1.599885 | -1.893653 |
| C | -0.147472 | -0.937130 | -0.806287 |
| C | -0.967985 | -0.195941 | 0.138019  |
| N | -0.247439 | 0.574596  | 0.934072  |
| C | -2.445105 | -0.306111 | 0.246135  |
| H | -0.506046 | -1.626462 | -1.561088 |
| C | -3.289241 | 0.581204  | -0.424764 |
| C | -2.976235 | -1.411695 | 1.115128  |
| C | -2.900568 | 1.643744  | -1.218654 |
| H | -4.359005 | 0.409118  | -0.303391 |
| H | -3.636720 | 2.274859  | -1.703305 |
| H | -1.855021 | 1.891029  | -1.366523 |
| H | -2.650055 | -1.278237 | 2.155515  |
| H | -4.069433 | -1.444931 | 1.099734  |
| H | -2.598966 | -2.393888 | 0.798429  |

## References

- (1) FRISCH, M. J., TRUCKS, G. W., SCHLEGEL, H. B., SCUSERIA, G. E., ROBB, M. A., CHEESEMAN, J. R., MONTGOMERY, J. A., JR., VREVEN, T., KUDIN, K. N., BURANT, J. C., MILLAM, J. M., IYENGAR, S. S., TOMASI, J., BARONE, V., MENNUCCI, B., COSSI, M., SCALMANI, G., REGA, N., PETERSSON, G. A., NAKATSUJI, H., HADA, M., EHARA, M., TOYOTA, K., FUKUDA, R., HASEGAWA, J., ISHIDA, M., NAKAJIMA, T., HONDA, Y., KITAO, O., NAKAI, H., KLENE, M., LI, X., KNOX, J. E., HRATCHIAN, H. P., CROSS, J. B., BAKKEN, V., ADAMO, C., JARAMILLO, J., GOMPERS, R., STRATMANN, R. E., YAZYEV, O., AUSTIN, A. J., CAMMI, R., POMELLI, C., OCHTERSKI, J. W., AYALA, P. Y., MOROKUMA, K., VOTH, G. A., SALVADOR, P., DANNENBERG, J. J., ZAKRZEWSKI, V. G., DAPPRICH, S., DANIELS, A. D., STRAIN, M. C., FARKAS, O., MALICK, D. K., RABUCK, A. D., RAGHAVACHARI, K., FORESMAN, J. B., ORTIZ, J. V., CUI, Q., BABOUL, A. G., CLIFFORD, S., CIOSLOWSKI, J., STEFANOV, B. B., LIU, G., LIASHENKO, A., PISKORZ, P., KOMAROMI, I., MARTIN, R. L., FOX, D. J., KEITH, T., AL-LAHAM, M. A., PENG, C. Y., NANAYAKKARA, A., CHALLACOMBE, M., GILL, P. M. W., JOHNSON, B., CHEN, W., WONG, M. W., GONZALEZ, C., AND POPLER, J. A. Gaussian 03, Revision C.02. Gaussian, Inc., Wallingford, CT, 2004.
- (2) BRINKER, U. H. AND KÖNIG, L. Carben-Umlagerungen, X: 2-Vinylcyclobutyliden. *Chem. Ber.* **116** (1983), 882–893.
- (3) ORCHARD, S. W. AND THRUS, B. A. Unimolecular Isomerisation of Hexa-1,*trans*-3,5-triene and Symmetry-forbidden Pyrolysis of Cyclohexa-1,3-diene. *J.C.S. Chem. Comm.* **1** (1973), 14–15.
- (4) ROSE, T., SEYSE, R. J., AND CRANE, P. M. Isomerization of Chemically Activated Bicycle[3.1.0]hex-Z-ene and Related C<sub>6</sub>H<sub>8</sub> Isomers. *Int. J. Chem. Kinet.* **6** (1974), 899–920.
- (5) LEWIS, F. D., TENG, P. A., AND WEITZ, E. Infrared Multiphoton Isomerization of *cis*- and *trans*-1,3,5-Hexatriene. *J. Phys. Chem.* **87** (1983), 1666–1668.
- (6) CICHRA, D. A., DUNCAN, C. D., AND BERSON, J. A. Mechanistic Characterization of the Intermediates in the Thermal and Photochemical Deazetation of Two Isomeric Methylene-pyrazolines, 7-Isopropylidene-2,3-diazabicyclo[2.2.1]hept-2-ene and 2,2-Dimethyl-3,4-diazabicyclo[3.3.0]octa-3,8-diene. An Approach to the Generation and Capture of Protoplanar and Protobisected Trimethylenemethanes. *J. Am. Chem. Soc.* **102** (1980), 6527–6533.
